# Supplementary material for: An RxLR Effector from Phytophthora infestans Prevents Re-localisation of Two Plant NAC Transcription Factors from the Endoplasmic Reticulum to the Nucleus
Source: PubMed Central journal article supplement (PMC3795001; doi:10.1371/journal.ppat.1003670), 2013-10-10
Supplement: ppat.1003670.s003.pdf [file ppat.1003670.s003.pdf]

10 20 30 40 50 60 70 80 90 100

At1g32870\_-----MDLSVENGGLAPGFRFHPTDEELVYYLKRKIRR--KKLRVEATGETDVYKFDPEELP-----EKALYKT  
 At1g33060\_-----MNQIKNKTLPMTTEQALLSMEALPLGFRFRPTDEELINHYLRKIKING--RDLEVRVPEIDVCKWEP-WDLPG-----LSVIKT  
 At1g34180\_-----MVDSSRSDSCFKAGKFSAPGFRFHPTDEELVYYLKRKICC--KKLRVNATGVVDVYKVDPELPGNFQHLIDFDSCLSM LKT  
 At3g10500\_-----MGRGSVTS LAPGFRFHPTDEELVYYLKRKICN--KPFKFDATSVTDVYKSEP-WDLPD-----KSR LKS  
 At3g44290\_-----MAAAPPIEPAVTTTFPGFKFSPTDELISYYLKRKMDG--LERSVEITPEVEIYNFEP-WDLPD-----KSI VKS  
 At3g49530\_-----MNQNLHVL SMDSLPLGFRFRPTDEELVYYLKRKIKING--HDDDVKATREIDICKWEP-WDLPD-----FSV IKT  
 At1g34190\_-----MADSSPDCSCFKGKFSAPGFRFHPTDEELVYYLKRKICR--KRLRVNVTGVVDVYKMDPEELPG-----OSM LKT  
 At2g27300\_-----MSKEAEMSI AVSALFPGFRFSPDVELISYYLRRKIDG--DENSVAVIAEVEIYKFEF-WDLPE-----ESK LKS  
 At4g35580\_-----MGAVSMESLPLGFRFRPTDEELVHYLRKIKING--RHS DVRVIPDIDVCKWEP-WDLPA-----LSV IKT  
 At1g01010\_-----MEDQVGFGRFPNDEELVHYLRKIKING--RHS DVRVIPDIDVCKWEP-WDLPA-----LSV IKT  
 At5g04410\_-----MGRGSVTS LAPGFRFHPTDEELVYYLKRKVCN--KPFKFDATSVTDIYKSEP-WDLPD-----KSR LKS  
 At4g01540\_-----MMKGLIGYRFSPTEGEVINHYLRKIKING--KYWLVD EATSEINILSHKPSKDLPK-----LARIQS  
 At4g01550\_-----MVKDLVGRFYPTGEELINHYLRKIKING--KTWLVD EATSEINICSYDP-IYLP S-----LSK IKS  
 StNTP1\_----MMAVLPGENPIAVLPVDKQMGIPPLNTLPVGYRFRPTDEELVHYLRKIKING--ADSQVSVIREVDICKLEP-WDLPD-----LSV VES  
 NbNTP1\_----MMAVLPGDNVVAVLPVDKQMGIPPLNTLPVGYRFRPTDEELVHYLRKIKING--ADSEVSVIREVDICKLEP-WDLPD-----MSV VES  
 StNTP2\_ MKLLMDSSAPSSSSSPCKEMKVSECFGENSVFPFGFRFHPTDEELVYYLKRKICR--RRILLDAIETDVYKWDPE-DL P-----LSK IKT  
 NbNTP2\_ MKLLMDSSTPSSSSACKKIKVFGESTG--IFPPGFRFHPTDEELVYYLKRKICR--RRILLDAIETDVYKWDPE-DL P-----LSK IKT

110 120 130 140 150 160 170 180 190 200

At1g32870\_ RDROWFFFSLRDRKHG--SRSSRATERGYWKATGKDRVITHCD-----SRPVGEKKTLVFHRGRAPNGERTNWMVHEYTLH---KEETKRCGGEDVKD  
 At1g33060\_ DDQEWFFFCPRDRKYPSGHRSNRATDIGYWKATGKDRTIKSK-----KMIIGMCKTLVFYRGRAPRGERTNWMVHEYRAT---DKELDGTGP--GQN  
 At1g34180\_ GDRQWFFFTPRNRKYPNAARS SRGTATGYWKATGKDRVIEYN-----SRVGLKKTTLVFYRGRAPNGERTDWMVHEYTMD---EELGRCK--NAKE  
 At3g10500\_ RDLEWYFFSMLDKKYRNGSKTNRATEMGYWKATGKDRILNG-----SKVVG MCKTLVYHKGRAPRGERTNWMVHEYRLV---DQDLDTG--VHQD  
 At3g44290\_ -DSEWFFFCARCKKYPHGSQNRATKIGYWKATGKDRNVKSG-----SEVIGTKR TLVFHIGRAPKGRTEWLMHEYCMIGVSLDALVICRLRRNTE  
 At3g49530\_ KDSEWLYFCPLDRKYPSGSRQNRATVAGYWKATGKDRKIKSGK-----TNIIGVKR TLVFHAGRAPRGRTNWMVHEYRAT---EDDLSG TNP--GQS  
 At1g34190\_ GDRQWYFTPRSRKYPNAARSNRCTENGYWKATGKDRVIEYN-----SRVGLKKTTLVFYRGRAPSGERTDWMVHEYTMD---EDELGRCK--NPQE  
 At2g27300\_ -ENEWFYFCARGRKYPHGSQRATQLGYWKATGKDRSVKSG-----NQVVGTKR TLVFHIGRAPRGERTEWIMHEYCIHGAPQDALVVCRLRNAD  
 At4g35580\_ DDPEWFFFCPRDRKYPNGHRSNRATDSGYWKATGKDRSIKSK-----KTLIGMCKTLVFYRGRAPKGRERTNWMVHEYRPT---LKDL DGTSP--GQS  
 At1g01010\_ RDAMWYFFSRENNKCN--RQSRITVSGKWKLTGSEVVKDQWGFCSGFRGKIGHKRVLVFELDGRVDPDKTKSDWVHEFHFDLLPEHQRTYVICRLEYK  
 At5g04410\_ RDLEWYFFSMLDKKYRNGSKTNRATEMGYWKATGKDRILNG-----SRVVG MCKTLVYHKGRAPRGERTNWMVHEYRLS---DEDLKKAG--VPQE  
 At4g01540\_ EDLEWYFFSEI EYTNPKMKMKRTTGSQWKPTGVDREIRDKR-----GNGVVICIKKTLVYHGEKSEPHGVTEPVMVHEYHITCLPHHKRKYVVCQVKYK  
 At4g01550\_ DDPVWYFFCPEYTS AKKKVTKRTTSSGYWKATGDRKIKDKR-----GNRGEIGIKKTLVYHGEGRVPEKGVTEPVMVHEYHITCLPQDRNYVICQV MYK  
 StNTP1\_ HDNEWFFFCPKDRKYONGORLNRATERGYWKATGKDRNIVTKK-----GAKIGMCKTLVYHIGRAPEGRTEHWVHEYRAT---EKSLDGSH P--GQG  
 NbNTP1\_ NDNEWFFFCPKDRKYONGORLNRATERGYWKATGKDRNIATKK-----GAKIGMCKTLVYHIGRAPEGRTEHWVHEYRAT---DKSLDGSH P--GQG  
 StNTP2\_ GDRQWFFFSPRDRKYPNGARSNRASKHGYWKATGKDRIITCN-----SRAVGVKKTTLVFYKGRAPVGERTDWMVHEYTMD---EELKRCQN--AQD  
 NbNTP2\_ GDRQWFFFSPRDRKYPNGARSNRATKHGYWKATGDRRIITCN-----SRAVGVKKTTLVFYKGRAPVGERTDWMVHEYTMD---EELKRCEN--STK
