# Supplementary material for: An RxLR Effector from Phytophthora infestans Prevents Re-localisation of Two Plant NAC Transcription Factors from the Endoplasmic Reticulum to the Nucleus
Source: PubMed Central journal article supplement (PMC3795001; doi:10.1371/journal.ppat.1003670), 2013-10-10
Supplement: ppat.1003670.s007.pdf [file ppat.1003670.s007.pdf]

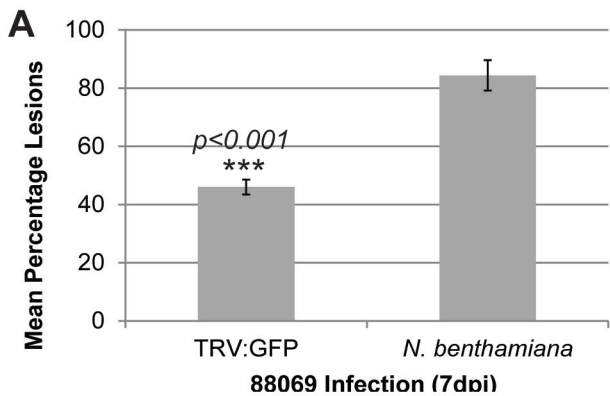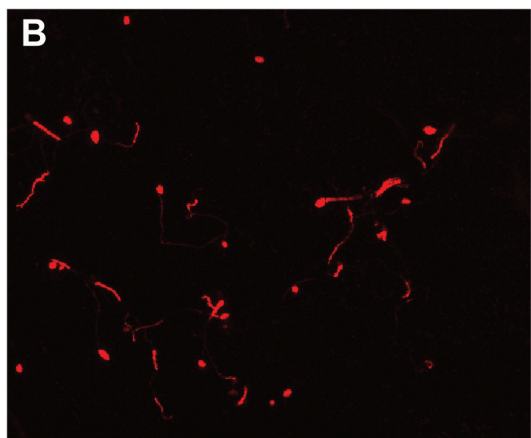

Surface Growth

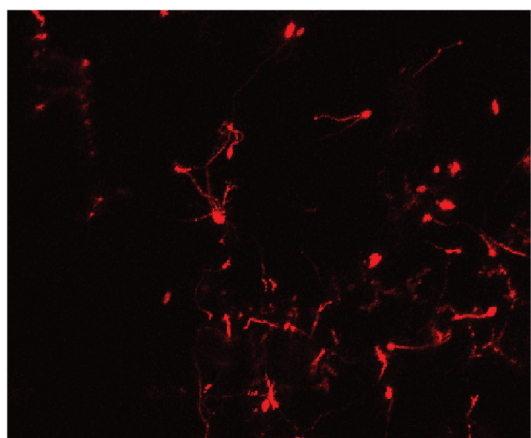

Initial Colonisation

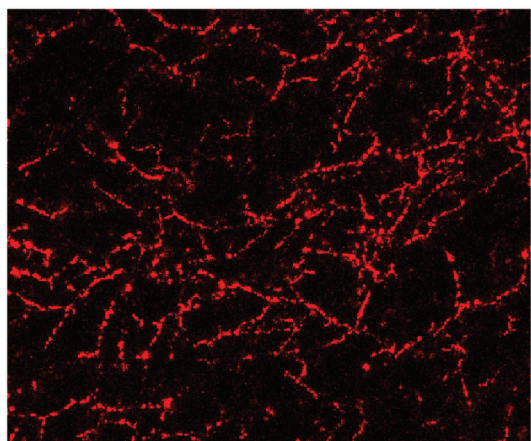

Extensive Mycelial Growth
