# Supplementary material for: An RxLR Effector from Phytophthora infestans Prevents Re-localisation of Two Plant NAC Transcription Factors from the Endoplasmic Reticulum to the Nucleus
Source: PubMed Central journal article supplement (PMC3795001; doi:10.1371/journal.ppat.1003670), 2013-10-10

■ NbNTP1 flg22 ■ NbNTP1 CF ■ NbNTP2 flg22 ■ NbNTP2 CF

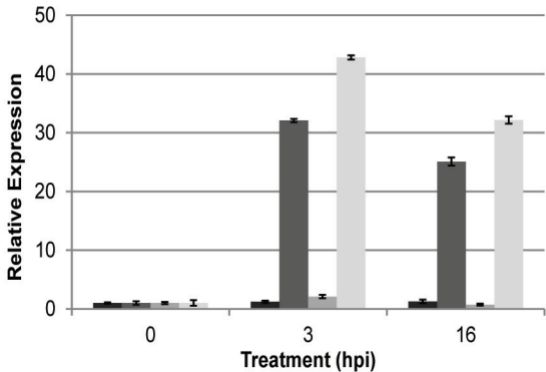

Supplement: ppat.1003670.s010.pdf [file ppat.1003670.s010.pdf]
